### Withdrawal Statement

**Title:** Estimates of Undernutrition among migrant/refugee children in lower-middle-income countries: A meta-analysis of published evidence from 2010-2022

**Authors:** Rounik Talukdar<sup>1</sup>, Vivek Kumar<sup>2</sup>, and Diplina Barman<sup>1</sup>

1 ICMR – NICED, West Bengal, India

2 Deepak Foundation, India

**Corresponding author & mail:** Dr. Rounik Talukdar ([talukdar.rounik1@gmail.com](mailto:talukdar.rounik1@gmail.com))

**Withdrawal statement:**

This manuscript is hereby withdrawn owing to the methodological flaws in inclusion criteria used, high heterogeneity and less generalizability of the results.
